# Supplementary material for: Clematis vitalba Is a Natural Host of the Novel Ilarvirus, Prunus Virus I
Source: MDPI journal article supplement (doi:10.3390/v15091964), 2023-09-20
Supplement: s1 [file s1]

Supplementary Material S1 to

## ***Clematis vitalba* is a natural host of a novel ilarvirus, Prunus virus I**

Pal Salamon<sup>1</sup>, Zsuzsanna Nagyné-Galbács<sup>2</sup>, Emese Demian<sup>2</sup>, Adam Achs<sup>3</sup>, Peter Alaxin<sup>3,4</sup>, Lukáš Predajňa<sup>3</sup>, Evans Duah Agyemang<sup>5</sup>, Francesco Desiderio<sup>2</sup>, Andras Takacs<sup>5</sup>, Wulf Menzel<sup>6</sup>, Dijana Škorić<sup>7</sup>, Miroslav Glasa<sup>3,4</sup>, Éva Varallyay<sup>2\*</sup>

\*Correspondence: [varallyay.eva@uni-mate.hu](mailto:varallyay.eva@uni-mate.hu)

### **Bioinformatic analysis of the small RNA HTS**

**Small RNA sequencing revealed** 15,370,590 reads 14,931,734 reads remained after trimming, representing 2,439,290 non-redundant reads. Size distribution of the sequenced reads showed peaks at 21, 22 and 24nt confirming that they are products of DICER enzymes.

| Library code | Sequenced reads | Trimmed reads all (containing redundants) | Non-redundant reads | Number of contigs |
|--------------|-----------------|-------------------------------------------|---------------------|-------------------|
| 209_Clematis | 15370590        | 14931734                                  | 2439290             | 18754             |

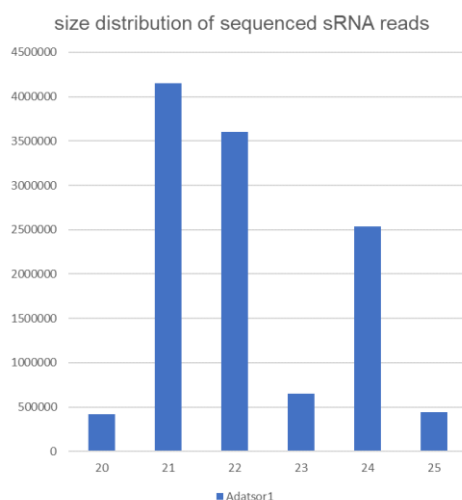

From these reads 18,754 contigs could be built. BLAST search of these contigs (carried out in early 2021) showed that 108 contigs could be mapped to the reference genomes of both three RNAs of several different ilarviruses. Moreover, 76 other contigs could be mapped to different badnaviruses, not more than two for any of them suggesting a presence of a badnavirus (these results are not discussed in details here). Mapping of the reads to the reference genomes of TSV, strawberry necrotic shock virus (SNSV), american plum line pattern virus (APLPV), parietaria mottle virus (PMV), citrus variegation virus (CVG), blackberry chlorotic ringspot virus (BCRV), ageratum latent virus (AgLV), privet ringspot virus (PRV), cape gooseberry ilarvirus 1 (CGIV1) showed that the number of mapped reads varied from 17-1667 read per million reads (RPM), and showed 17,5-51,7% coverage of the viral RNAs.

Detailed results of the bioinformatics analysis of small RNA HTS of different libraries

| PrVI hit | PrVI                             | MW579753 | MW579754 | MW579755 |
|----------|----------------------------------|----------|----------|----------|
|          |                                  | RNA1     | RNA2     | RNA3     |
|          | number of contigs                | 885      | 792      | 518      |
|          | number of non-redundant reads    | 184852   | 112709   | 273927   |
|          | number of redundant reads        | 14612    | 11399    | 16679    |
|          | RPM                              | 981      | 765      | 1119     |
|          | coverage of the viral genome (%) | 97.3%    | 96.7%    | 97.1%    |

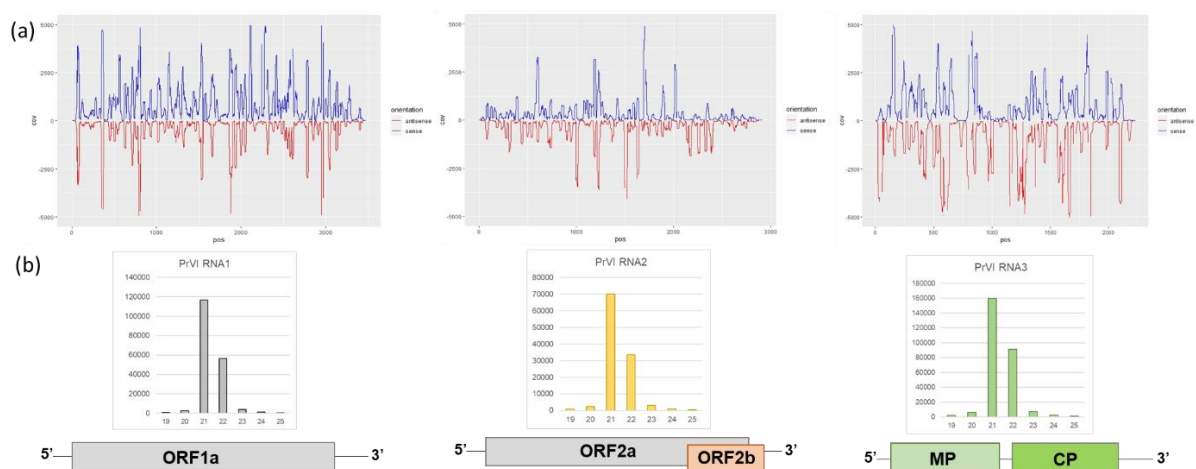

Profiles of PrVI-derived sRNAs. (a) distribution of the PrVI-derived sRNAs on the RNA1, RNA2 and RNA3. Sense and antisense sequence orientations are indicated by red and blue colors, respectively. (b) Size distribution of PrVI-derived sRNAs based on their origin. The representation of the corresponding genomic RNA can be found at the bottom of the Figure.
