# Supplementary material for: Clematis vitalba Is a Natural Host of the Novel Ilarvirus, Prunus Virus I
Source: MDPI journal article supplement (doi:10.3390/v15091964), 2023-09-20
Supplement: s1 [file s1]

Supplementary Figures to

## *Clematis vitalba* is a natural host of a novel ilarvirus, Prunus virus I

Pal Salamon<sup>1</sup>, Zsuzsanna Nagyné-Galbács<sup>2</sup>, Emese Demian<sup>2</sup>, Adam Achs<sup>3</sup>, Peter Alaxin<sup>3,4</sup>, Lukáš Predajňa<sup>3</sup>, Evans Duah Agyemang<sup>5</sup>, Francesco Desiderio<sup>2</sup>, Andras Takacs<sup>5</sup>, Wulf Menzel<sup>6</sup>, Dijana Škorić<sup>7</sup>, Miroslav Glasa<sup>3,4</sup>, Éva Varallyay<sup>2\*</sup>

\*Correspondence: [varallyay.eva@uni-mate.hu](mailto:varallyay.eva@uni-mate.hu)

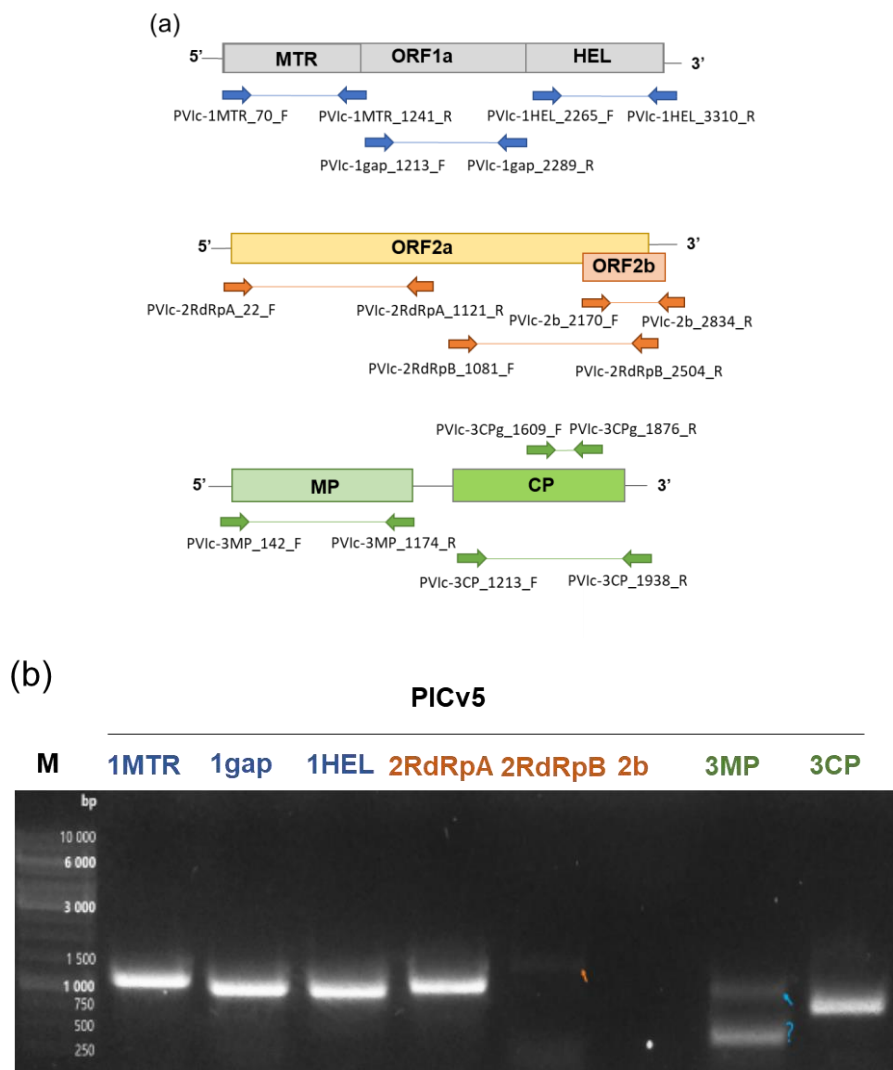

**Figure S1.** Validation of RNA sequencing. (a) Primers were designed based on the ilarvirus specific contig sequences able to amplify almost all three RNAs of the entire genome. (b) result of the RT-PCR. M corresponds to GeneRuler 1kb DNA Ladder (Thermo Fisher Scientific, Waltham, MA, USA). Arrows indicate the positive products.

Tobacco streak virus gene for movement protein, complete cds, isolate: dahlia  
Sequence ID: [LC030107.1](#) Length: 873 Number of Matches: 11  
Range 1: 1 to 753 [GenBank](#) Next Match Previous Match

Alignment statistics for match #1

|       | Score          | Expect                                                       | Identities   | Positives    | Gaps      | Frame |
|-------|----------------|--------------------------------------------------------------|--------------|--------------|-----------|-------|
|       | 502 bits(1091) | 7e-143                                                       | 203/251(81%) | 234/251(93%) | 0/251(0%) | +3/+1 |
| Query | 210            | MALTPSYRALTFSADESSLEKSVSDALSGCVELNMGLRRCFAFPATNTEAFLCELTKE   |              |              |           | 389   |
|       |                | MAL P+ +ALTFSADDE+SLEK++++ALSG VE+NMGLRRCFAFP NT AFLCELTKE   |              |              |           |       |
| Sbjct | 1              | MALVPTMKALTFSAEDETSLEKAITALSVEINMGLRRCFAFPVNTGAFCELTKE       |              |              |           | 180   |
| Query | 390            | TKTILGKFADKVRGRVFDHAVIHMMYIPVILSTTHAVAEKIRNMTGDELYGGTKVNL    |              |              |           | 569   |
|       |                | TK+ +GKF+DKVRGRVFDHAVIH+MYIPVIL+TTHA+AELK++N+ATGDELYGGTKVNL  |              |              |           |       |
| Sbjct | 181            | TKSFIGKFSDKVRGRVFDHAVIHLMYIPVILNTTHAIAELKLNLATGDELYGGTKVNL   |              |              |           | 360   |
| Query | 570            | NEAFILMTWPRSLFADAVHAHKGGLYLGGTVNCATSVKGCNIGMWYPMWSEKVSNNKQLY |              |              |           | 749   |
|       |                | ++AFILMTWPRSLFA+AVH+H+GLYLGGTV+CA+SVP IGMWYPMWSEKVSNNKQLY    |              |              |           |       |
| Sbjct | 361            | SKAFILMTWPRSLFAEAVHSHRGLYLGGTVSCASSVPANAKIGMWYPMWSEKVSNNKQLY |              |              |           | 540   |
| Query | 750            | QNTTNIVNTKALETFTTRTMISSDREMRSLRSRASIDIAAKTAEKPVLCSSHVNLLDQHT |              |              |           | 929   |
|       |                | QNT NI NT+ALETFTTRTMISSDREMRSLRSRASIDIAAKT EKPV+CS V+LLDQHT  |              |              |           |       |
| Sbjct | 541            | QNTVNIHNTAELETFTTRTMISSDREMRSLRSRASIDIAAKTLEKPVICSERVSLDQHT  |              |              |           | 720   |
| Query | 930            | SGVDFTVKQVQ 962                                              |              |              |           |       |
|       |                | GVDFTV +++                                                   |              |              |           |       |
| Sbjct | 721            | QGVDFTVAEIE 753                                              |              |              |           |       |

Tobacco streak virus movement protein gene, complete cds  
Sequence ID: [MK307506.1](#) Length: 873 Number of Matches: 12  
Range 1: 1 to 750 [GenBank](#) Next Match Previous Match

Alignment statistics for match #1

|       | Score          | Expect                                                       | Identities   | Positives    | Gaps      | Frame |
|-------|----------------|--------------------------------------------------------------|--------------|--------------|-----------|-------|
|       | 492 bits(1068) | 1e-139                                                       | 198/250(79%) | 231/250(92%) | 0/250(0%) | +3/+1 |
| Query | 210            | MALTPSYRALTFSADESSLEKSVSDALSGCVELNMGLRRCFAFPATNTEAFLCELTKE   |              |              |           | 389   |
|       |                | MAL P+ +ALTFSADDE+SLEK++++ALSG VELNMGLRRCFAFP NT AFLCELTKE   |              |              |           |       |
| Sbjct | 1              | MALVPTMKALTFSADDETSLEKAITALSVELNMGLRRCFAFPVNTGAFCELTKE       |              |              |           | 180   |
| Query | 390            | TKTILGKFADKVRGRVFDHAVIHMMYIPVILSTTHAVAEKIRNMTGDELYGGTKVNL    |              |              |           | 569   |
|       |                | TK+ +GKF+DKVRGR FVDHAVIH++Y+PVIL TT+A++ELK++N+ATGDELYGGTKV+L |              |              |           |       |
| Sbjct | 181            | TKSFIGKFSDKVRGRVFDHAVIHLMLPVILKTTYAISELKLKNLATGDELYGGTKVDL   |              |              |           | 360   |
| Query | 570            | NEAFILMTWPRSLFADAVHAHKGGLYLGGTVNCATSVKGCNIGMWYPMWSEKVSNNKQLY |              |              |           | 749   |
|       |                | ++AFILMTWPRSLFA+AVHAH+GLYLGGTV+CA+SVP IGMWYPMWSEKVSNNKQLY    |              |              |           |       |
| Sbjct | 361            | SKAFILMTWPRSLFAEAVHSHRGLYLGGTVSCASSVPSNAKIGMWYPMWSEKVSNNKQLY |              |              |           | 540   |
| Query | 750            | QNTTNIVNTKALETFTTRTMISSDREMRSLRSRASIDIAAKTAEKPVLCSSHVNLLDQHT |              |              |           | 929   |
|       |                | QNT NI +T+ALETFTTRTMISSDREMRSLRSRASIDIAA+T EKPV+CS V+LLDQHT  |              |              |           |       |
| Sbjct | 541            | QNTVNIHSTAELETFTTRTMISSDREMRSLRSRASIDIAARTPEKPVICSERVSLDQHT  |              |              |           | 720   |
| Query | 930            | SGVDFTVKQV 959                                               |              |              |           |       |
|       |                | GVDFTV ++                                                    |              |              |           |       |
| Sbjct | 721            | QGVDFTVSEI 750                                               |              |              |           |       |

**Figure S2. Alignment of the amino-acid sequences of the PV-0309 PrVI isolate to closely related TSV isolates**  
TBLASTX search of the RNA sequence of PRVI DSMZ PV-0309 strain (OL584350) showed high identity in the amino-acid sequence of the movement protein encoded by TSV dahlia strain (LC030107) or by a TSV strain infecting summer squash in Georgia, U.S.A.
