# Supplementary material for: Clematis vitalba Is a Natural Host of the Novel Ilarvirus, Prunus Virus I
Source: Viruses. 2023 Sep 20;15(9):1964. doi: 10.3390/v15091964 (PMC10536899; doi:10.3390/v15091964)
Supplement: Supplementary file 1 [file viruses-15-01964-s001.zip › Salamon et al_Supplemetary Tables.xlsx]

## Sheet: List of STables
Clematis vitalba is a natural host of a novel ilarvirus, Prunus virus I
Pal Salamon, Zsuzsanna Nagyné-Galbács, Emese Demian, Adam Achs, Peter Alaxin, Lukáš Predajňa, Evans Duah Agyemang, Francesco Desiderio, Andras Takacs, Wulf Menzel, Dijana Škorić, Miroslav Glasa, Éva Varallyay*
*	Correspondence: varallyay.eva@uni-mate.hu
List of Supplemetary Tables
Table S1
Viruses which have been reported to infect Clematis species
Table S2
PCR primer sequences used for virus detection with their appropriate references
Table S3
GenBank identifiers of the amplified and sequenced virus specific products
Table S4
Percent identity matrix of the amino acid sequences of the proteins encoded by different PrVI strains
Table S5
Results of the investigation on the occurrence of PrVI in different peach and sweet cherry cultivars in Hungary

## Sheet: Table S1
	Table S1
	Viruses which have been reported to infect Clematis species
	Family	Genus	Virus	Clematis species	Country of origin	Symptoms	Method for the detection	GenBank accession number	Reference
	Tombusviridae	Tombusvirus	TBSV	C. sp	UK	severly damaged	?	?	Koenig, 1985
				7 cultivars 'Bal Tsvetov, Gibrid Orlova, Isago, Mrs George Jackman, Nikolai Rubtsov, Ramona, Valge Daam'	Russia			OM339537	Chirkov et al, 2023
			MPV	Valge Daam'	Russia	leaf chlorosis, mottling, mosaic, and vein yellowing	HTS and RT-PCR	MG250195	Zakubanskiy et l, 2018
		Pelarsovirus	ClCMV	9 cultivars: ‘Barbara’, ‘Bees Jubilee’, ‘Dancing Dorien’, ‘Gypsy Queen’, ‘Henryi’, ‘Jackmanii’, ‘Natascha’, ‘Niobe’, and ‘Still Waters’	USA	yellow mottling, veining, chlorotic ringspots, line pattren mosaics, flower distortion, discoloration	TEM, RT-PCR, full genome sequencing	KX712140	McLaughlin, 2017
				24 cultivars: ‘Barbara’, ‘Beata’, ‘Black Tea’, ‘Diana’, ‘Dorthy Walton’, ‘Gypsy Queen’, ‘Honoras’, ‘Jackmanii’, ‘John Huxtable’, ‘Kinju Atarashi’, ‘Lady Betty Balfor’, ‘Margaret Hunt’, ‘Marmori’, ‘North Star Ponjnel’, Perle d’Azur’, ‘Rahvarinne’, ‘Ramona’, ‘Caddick’s Cascade Semu’, ‘Tie Dye’, ‘Valge Daam’, ‘Hagley Hybrid’, ‘Dutch Sky Throcroft’, ‘Marmori’, and ‘Ville de Lyon’.	UK
				7 cultivars ‘Isago’, ‘Mrs Cholomondeley’, ‘Mrs N Thompson’, ‘Slava’, ‘Etoile Violette’, ‘Proteus’ and ‘Rüütel’	Russia		HTS and RT-PCR	MH108622-MH108628	Zakubanskiy et l, 2018
				Proteus	Russia		HTS and RT-PCR	complete genome: MG660825	Chirkov et al, 2023
	Secoviridae	Nepovirus	TBRV	C.sp	Lithuania	?	ELISA, EM, RT-PCR	KF678372	Sneireris and Stanulis, 2014
			ToRSV	C.sp	?	?	?	n	Fulton, 1975
	Bunyaviridae	Tospovirus	TSWV	C.vitalba	Greece	thirps transmission from tobacco fields	ELISA		Chatzivassiliou, 2001
				C. flammula
	Virgaviridae	Tobravirus	TRV	C. heracleifolia DC.	UK	chlorotic fleck			Brunt and Thomas, 1975
	Bromoviridae	Cucumovirus	CMV	C.afoliata	New Zealand	leaf mottle	?		Dingley, 1969
				C. paniculata	New Zealand	leaf mottle/decline of the about 80 years old plant	ELISA		Guy, 2011
				Clematisxjackmanii "Superba"	UK	chlorotic vein banding	?		Thomas, 1975
				Clematisxjackmanii "Vyvyan Pennell"	UK	chlorotic lesion
				C.apiifolia	Korea, natural habitat	distinct systemic mosaic and leaf malformation	RT-PCR	RNA3_LC546042	Nam et al, 2022
				Valge Dam'	Russia		RT-PCR, HTS	complete genome: ON186643-45	Chirkov et al, 2023
		Ilarvirus	TSV	C.vitalba	Yugoslavia	chlorotic spots and yellow netting and lack of symptoms	biotest,EM, serology - low cross reaction of the Cle antiera with other TSV strains	no sequence record	Rana et al, 1987
				C.vitalba	Italy (around Bologna)	yellow mosaic, vein yellowing, photo of the symptoms: https://plantwiseplusknowledgebank.org/doi/full/10.1079/pwkb.species.48107	biotest, EM, serology - cross reaction with North -American TSV isolate	no sequence record	Bellardi et al 1985
			ApMV	C.vitalba	Turkey	lack of symptoms	biotest, ELISA (ApMV-hop isolate)	no sequence record	Sökmen, 2005
							RT-PCR	no sequence record	Sökmen, 2008
			PrVI	3 cultivars: Etoile Violette, Proteus and Ramona	Russia	multiple infection, not possible to link to PrVI	HTS and RT-PCR	Complete genome	Chirkov et al, 2023
				C.vitalba	Croatia (around Zagreb)	no symptom mentioned in the record		Complete genome	only Genbank
				C.vitalba	Hungary (around Budapest)	line pattern and chlorortic spots	small RNA HTS, RT-PCR	Complete genome	this work

## Sheet: Table S2
	Table S2
	PCR primer sequences used for virus detection with their appropriate references
	Virus	Primer Name	Primer Sequence (5'-3')	Position on the reference genome	Funcion of the amplified region	Genome used as a reference	amplified product	Reference*
	PrVI RNA1	ClIVRNA1_213F	GTGATTTCCAGAAGTTGAATGTCGG	213-237	RNA1	MW579753.1	3032	this work
		ClIVRNA1_3254R	CTATCTGATCATCGTTGTCATGAG	3245-3222
		ClIVRNA1_970F	GACACTCAGTATGGCAGACGG	970-990			sequencing
		ClIVRNA1_2481R	GTCGTCTTCCCACAACCAGCG	2481-2461			sequencing
		PVIc-1MTR_F	CGTTTGTTGTCCTCCTATTAGCG	70-92	methyltransferase		1172
		PVIc-1MTR_R	AAGATGAGAGCATCGTGG	1241-1224
		PVIc-1gap_F	TCAGTACATTGCCACGATGC	1213-1232	“gap”		1077 bp
		PVIc-1gap_R	AGAGTCACGTAACCATCC	2289-2272
		PVIc-1HEL_F	TGACTGAGGATGGTTACG	2265-2282	helicase		1046 bp
		PVIc-1HEL_R	TCAAATCACGCGAACGGCATC	3310-3290
	PrVI RNA2	ClIVRNA2_297F	TACCTTCCTTATGATGATCTGGATG	303-327	RNA2	MW579754.1	2489
		ClIVRNA2_2777R	CATTCACCAACACAAGACTCCACTT	2792-2770
		ClIVRNA2_1081F	CGAGATTGGCAAAGTTGTTAC	1081-1101			sequencing
		PVIc-2RdRpA_F	AATCAGCCTCCGTAATGG	22-40	RdRp - start		1100 bp
		PVIc-2RdRpA_R	AAGCTCTTCACCTGACATCG	1121-1102
		PVIc-2RdRpB_F	CGAGATTGGCAAAGTTGTTACCG	1081-1103	RdRp - end		1424 bp
		PVIc-2RdRpB_R	TTCACAGAGAACCCAACC	2504-2487
	PrVI RNA3	ClIVRNA3_1F	GTATTCTCTGCGCATAATACCAC	1-23	RNA3	MW579755.1	1935
		ClIVRNA3_1903	TCAACCAGGAAATCCTCTGGTGGCA	1935-1911
		ClIVRNA3_702F	TGGTACCCGATGTGGTCGGAG	702-722			sequencing
		PVIc-3MP_F	AAGTCTTTCCCTAGACTCGG	139-158	movement protein		1 033 bp
		PVIc-3MP_R	ATTCCTCTGAGGTACTAGCACC	1170-1149
		PVIc-3CP_F	AGCTACTTCTTGAGCCTACC	1209-1228	capsid protein		726 bp
		PVIc-3CP_R	TCAACCAGGAAATCCTCTGG	1935-1916
		PVI-3CPg_F	GATTCCAGAGATTGGTGAGG	1606-1625	capsid protein (short)		268 bp
		PVI-3CPg_R	AGCTAAGCTCACGCGCTT	1873-1856
	PrVI RNA3	PrVI_CP-F	AACGATGCTATCACACTGAAGAC	1571-1593	capsid protein	MW579755.1	351 bp	Orfanidou et al., 2021
		PrVI_CP-R	CTCTGGTGGCAGCAAAGGC	1921-1903

## Sheet: Table S3
Table S3
GenBank identifiers of the amplified and sequenced virus specific products
place of origin	isolate		Genebank identifier	position on the reference genome	Closest genome identity to the reference on nucleotide level %
Hungary	CleHU	RNA1	OR192162	215-3234	OL584348_HR (98,6%)
		RNA2	OR192163	301-2790	OL472064_Picris and OL584349_HR (98,916%)
		RNA3	OR192164	1-1926	OR452179_Pl622 (98,849%)
Slovakia	PlCV5	RNA1	OR452176	38-3387	OR452175_Pl622 (98,56%)
		RNA2	OR452178	26-2821	OL472064_Picris (98,891%)
		RNA3	OR452180	16-2196	OL472065_Picris (97,893%)
Slovakia	Pl622	RNA1	OR452175	38-3387	OL472063_Picris(99,19%)
		RNA2	OR452177	26-2864	OL472064_Picris (96,936%)
		RNA3	OR452179	16-2202	OR192164_HU (98,849%)
Croatia	PV-0309	RNA1	OL584348	full genome	OR192162_HU (98,6%)
		RNA2	OL584349	full genome	OR192163_HU (98,916%)
		RNA3	OL584350	full genome	OR192164_HU (98,080%)
Hungary	CleSZD	RNA3	OR485309	1622-1924	OR192164_HU 301/304(99%)
	CleGD	RNA3	OR485310	1622-1924	OL472065_Picris 302/306(99%)

## Sheet: Table S4
Table S4
Percent identity matrix of the amino acid sequences of the proteins encoded by different PrVI strains
ORF1a	WCB70347_RU Clematis,	UTQ50868_SLO Picris,	UOF93064_CR Cvitalba	Pl622_SK Cvitalba,	PlCv5_SK Cvitalba	OR192162_HU Cvitalba,	MW579753_GR sweetcherry
WCB70347_RU Clematis,	x	98.991	98.991	98.991	98.257	99.006	98.624
UTQ50868_SLO Picris,	98.991	x	99.450	99.633	98.899	99.404	98.899
UOF93064_CR Cvitalba	98.991	99.450	x	99.817	98.716	99.404	98.899		within C. vitalba
Pl622_SK Cvitalba,	98.991	99.633	99.817	x	98.899	99.404	98.899	98,349-99,899	98,807-99,817
PlCv5_SK Cvitalba	98.257	98.899	98.716	98.899	x	98.807	98.349
OR192162_HU Cvitalba,	99.006	99.404	99.404	99.404	98.807	x	98.907
MW579753_GR sweetcherry	98.624	98.899	98.899	98.349	98.907	98.899	x
ORF2a	WCB70348_RU_Clematis	UTQ50869_SLO_Pircis	UOF93065_CR_Cvitalba	QSG73630_GR_sweetcherry	PrVI_RNA2_PlCv5	PrVI_RNA2_Pl622	OR192163_HU_Cvitalba
WCB70348_RU_Clematis	x	98.267	98.267	98.391	98.267	98.762	98.192
UTQ50869_SLO_Pircis	98.267	x	99.505	98.639	99.505	98.267	99.444
UOF93065_CR_Cvitalba	98.267	99.505	x	98.886	99.505	98.267	99.722
QSG73630_GR_sweetcherry	98.391	98.639	98.886	x	98.639	98.515	98.887		within C. vitalba
PrVI_RNA2_PlCv5	98.267	99.505	99.505	98.639	x	98.269	99.444	98,267-99,722	98,269-99,722
PrVI_RNA2_Pl622	98.762	98.267	98.267	98.515	98.269	x	98.333
OR192163_HU_Cvitalba	98.192	99.444	99.722	98.887	99.444	98.333	x
ORF2b	WCB70349_RU_Clematis	UTQ50870_SLO_Picris	UOF93066_CR_Cvitalba	QSG73631_GR_sweetcherry	PrVI_RNA2_PlCv5	PrVI_RNA2_Pl622	OR192163_HU_Cvitalba
WCB70349_RU_Clematis	x	96.098	96.078	96.585	94.146	97.073	96.500
UTQ50870_SLO_Picris	96.098	x	100.000	98.537	98.049	97.073	100.000
UOF93066_CR_Cvitalba	96.078	100.000	x	98.529	98.039	97.059	100.000
QSG73631_GR_sweetcherry	96.585	98.537	98.529	x	96.585	97.073	98.500		within C. vitalba
PrVI_RNA2_PlCv5	94.146	98.049	98.039	96.585	x	95.122	98.000	94,146-100	95,122-100
PrVI_RNA2_Pl622	97.073	97.073	97.059	97.073	95.122	x	97.500
OR192163_HU_Cvitalba	96.500	100.000	100.000	98.500	98.000	97.500	x
ORF3_MP	WCB70351_RU_Clematis	UTQ50872_SLO_Picris	UOF93068_CR_Cvitalba	QSG73633_GR_sweetcherry	PrVI_RNA3_PlCv5	PrVI_RNA3_Pl622	OR192164_HU_Cvitalba
WCB70351_RU_Clematis	x	99.550	99.550	99.099	99.099	99.550	99.065
UTQ50872_SLO_Picris	99.550	x	100.000	98.649	99.550	100.000	99.533
UOF93068_CR_Cvitalba	99.550	100.000	x	98.649	99.550	100.000	99.533
QSG73633_GR_sweetcherry	99.099	98.649	98.649	x	98.198	98.649	98.131		within C. vitalba
PrVI_RNA3_PlCv5	99.099	99.550	99.550	98.198	x	99.552	99.065	98,649-100	99,065-100
PrVI_RNA3_Pl622	99.550	100.000	100.000	98.649	99.552	x	99.533
OR192164_HU_Cvitalba	99.065	99.533	99.533	98.131	99.065	99.533	x
OrF3_CP	WCB70350_RU_Clematis	UTQ50871_SLO_Picris	UOF93067_CR_Cvitalba	QSG73632_GR_sweetcherry	PrVI_RNA3_PlCv5	PrVI_RNA3_Pl622	OR192164_HU_Cvitalba
WCB70350_RU_Clematis	x	97.000	97.333	95.667	97.333	97.000	97.333
UTQ50871_SLO_Picris	97.000	x	99.667	96.667	99.000	99.333	99.667
UOF93067_CR_Cvitalba	97.333	99.667	x	97.000	99.333	99.667	100.000
QSG73632_GR_sweetcherry	95.667	96.667	97.000	x	96.333	96.667	97.000		within C. vitalba
PrVI_RNA3_PlCv5	97.333	99.000	99.333	96.333	x	99.003	99.336	95,667-100	99,003-100
PrVI_RNA3_Pl622	97.000	99.333	99.667	96.667	99.003	x	99.668
OR192164_HU_Cvitalba	97.333	99.667	100.000	97.000	99.336	99.668	x

## Sheet: Table S5
Table S5
Results of the investigation on the occurrence of PrVI in different peach and sweet cherry cultivars in Hungary
Prunus spp.	cultivar	number of infected/sampled trees	Year of collection	Place of collection	Total number of samples	Number of sample positive to PrVI
P. persica	Flavortop	0/3	2019	Erd, Hungary	89	34
	Nektár H	0/4
	Venus	0/3
	Incrocio Pieri	0/4
	Elberta	0/4
	Cresthaven	0/3
	Andosa	0/1
	Baby Gold 7	0/3
	Ford	0/1
	Michelini	0/2
	Maria Bianca	0/1
	Baby Gold 6	0/3
	Fantasia	2/2
	Mariska	4/4
	Harko	4/4
	Baladin	0/1
	Andosa	0/4
	Michelini	0/3
	Redhaven	0/2
	Early Redhaven	0/1
	Regina	4/4
	Champion	4/4
	Suncrest	4/4
	Baladin	0/2
	Aranycsillag	0/3
	Springtime	0/3
	Apolka	0/4
	Öb 166/1	2/2
	Genadix 4	4/4
	Elvira	3/3
	Starling	3/3
P. subg. cerasus	Valerij Cskalov	10/10	2019	Erd, Hungary	106	27
	Bigarreau Burlat	0/12
	Katalin	0/9
	Szomolyai fekete	7/7
	Rita	0/10
	Carmen	0/10
	Vera	0/10
	Tünde	0/5
	Linda	0/8
	Aida	10/10
	Alex	0/10
	Anita	0/5
